# Supplementary material for: Knockout crickets for the study of learning and memory: Dopamine receptor Dop1 mediates aversive but not appetitive reinforcement in crickets
Source: PubMed Central journal article supplement (PMC4629116; doi:10.1038/srep15885), 2015-11-02
Supplement: srep15885-s1.pdf [file srep15885-s1.pdf]

Title: Knockout crickets for the study of learning and memory: Dopamine receptor Dop1 mediates aversive but not appetitive reinforcement in crickets.

Authors: Hiroko Awata, Takahito Watanabe, Yoshitaka Hamanaka, Taro Mito, Sumihare Noji, Makoto Mizunami

### Supplementary Figure S1

(a)

|                              |                                                    |
|------------------------------|----------------------------------------------------|
| Dop1-1F                      | 5' -AACGACGAGGACGATCTGC-3'                         |
| Dop1-2F                      | 5' -ACGACTATCAGGTGAACGGGT-3'                       |
| Lock-Docking oligo dT primer | 5' -AAGCAGTGGTATCAACGCAGAGTACT <sub>30</sub> VN-3' |
| Lock-Docking Anchor          | 5' -AAGCAGTGGTATCAACGCAGAGT-3'                     |

(b)

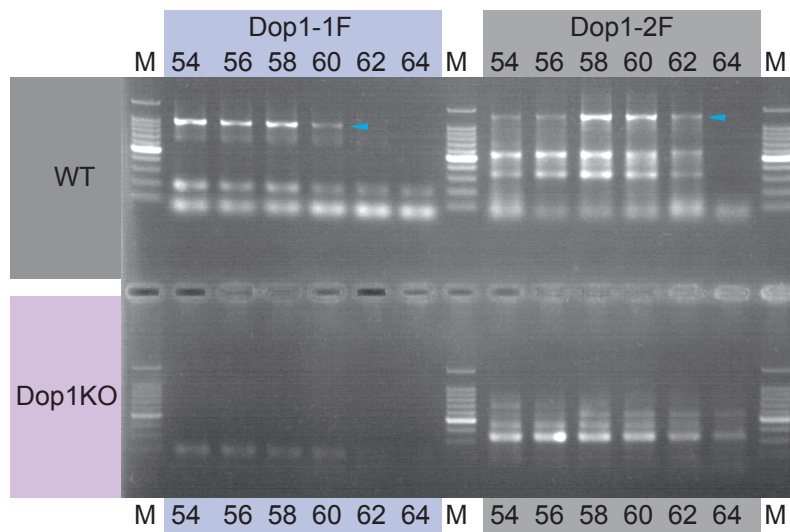

Title: Knockout crickets for the study of learning and memory: Dopamine receptor Dop1 mediates aversive but not appetitive reinforcement in crickets.

Authors: Hiroko Awata, Takahito Watanabe, Yoshitaka Hamanaka, Taro Mito, Sumihare Noji, Makoto Mizunami

### Supplementary Figure Legends

**Figure S1. Attempts to identify *Dop1* cDNA sequence of the *Dop1* knock-out (KO) by 3'RACE using *Dop1*-specific primers to determine whether mutated *Dop1* was expressed or not.** (a) Primers used in the 3'RACE. The upper two primers were designed on the 1st exon of cricket *Dop1* gene. First, cDNA was created using SuperscriptIII Reverse Transcriptase (Life Technologies) Lock-Docking oligo dT primer and total RNA from cricket heads. The 3'RACE was then performed using the *Dop1*-specific primer (Dop1-1F or Dop1-2F) and Lock-Docking Anchor according to the manufacture's instructions. (b) Electrophoresis photograph of the *Dop1* 3'RACE. Though we tried the amplification with some different conditions on the annealing step several times, any *Dop1*-specific fragments derived from the *Dop1*KO mutant were not amplified. The expected amplicons of *Dop1* were obtained using the wild-type (WT) cricket cDNA with the same conditions (arrowheads). We sequenced some amplicons shorter than we expected for *Dop1* amplicons, derived from the *Dop1*KO mutant (seen in the photograph), and confirmed that they were non-specific ones. M: 200 ng of 100 bp DNA ladder marker (TaKaRa). The numbers show the temperatures at the annealing step of the 3'RACE.
